# Supplementary material
Source: PubMed Central journal article supplement (PMC4891280)
Supplement: NIHMS774078-supplement-Supplementary_Table_1.pdf [file NIHMS774078-supplement-Supplementary_Table_1.pdf]

Supplementary Table 1

| <b>Mass Cytometry Staining Panel</b> |              |                     |              |
|--------------------------------------|--------------|---------------------|--------------|
| <i>Antibody</i>                      | <i>Clone</i> | <i>Manufacturer</i> | <i>Label</i> |
| ICOS                                 | C398.43      | Biolegend           | 141-Pr       |
| CD19                                 | H1B19        | Fluidigm            | 142-Nd       |
| TIM3                                 | F38-2E2      | Biolegend           | 143-Nd       |
| CCR5                                 | NP-6G4       | Fluidigm            | 144-Nd       |
| CD4                                  | RPA-T4       | Fluidigm            | 145-Nd       |
| CD8a                                 | RPA-T8       | Fluidigm            | 146-Nd       |
| CD20                                 | 2H7          | Fluidigm            | 147-Sm       |
| CD38                                 | HIT7         | Biolegend           | 148-Nd       |
| CCR4                                 | 205410       | Fluidigm            | 149-Sm       |
| CD43                                 | 84-3C1       | Fluidigm            | 150-Nd       |
| CD107a                               | H4A3         | Fluidigm            | 151-Eu       |
| TCRgd                                | 11F2         | Fluidigm            | 152-Sm       |
| CD45RA                               | HI100        | Fluidigm            | 153-Eu       |
| CD45                                 | HI30         | Fluidigm            | 154-Sm       |
| CXCR3                                | G025H7       | Fluidigm            | 156-Gd       |
| CD33                                 | WM53         | Fluidigm            | 158-Gd       |
| CCR7                                 | G034H7       | Fluidigm            | 159-Tb       |
| CD28                                 | CD28.2       | Fluidigm            | 160-Gd       |
| BTLA                                 | MIH26        | Biolegend           | 161-Dy       |
| CD69                                 | FN50         | Fluidigm            | 162-Dy       |
| HLA-DR                               | L243         | Biolegend           | 163-Dy       |
| CD45RO                               | UCHL1        | Fluidigm            | 164-Dy       |
| CD16                                 | 3G8          | Fluidigm            | 165-Ho       |
| CD44                                 | BJ18         | Fluidigm            | 166-Er       |
| CD27                                 | O323         | Fluidigm            | 167-Er       |
| CD25                                 | 2A3          | Fluidigm            | 169-Tm       |
| CD3                                  | SP34-2       | Fluidigm            | 170-Er       |
| CXCR5                                | J252D4       | Biolegend           | 171-Yb       |
| CD57                                 | HCD57        | Fluidigm            | 172-Yb       |
| PD-1                                 | EH12.2H7     | Biolegend           | 174-Yb       |
| PD-L1                                | 29E.2A3      | Fluidigm            | 175-Lu       |
| CD56                                 | CMSSB        | Fluidigm            | 176-Yb       |
| Nucleic<br>Acid                      |              |                     | 191-Ir       |
| Intercalator                         | --           | Fluidigm            | 193-Ir       |
| Cisplatin                            | --           | Fluidigm            | 195-Pt       |
